# Supplementary material
Source: HighWire-hosted journal article supplement (https://jitc.bmj.com/content/11/2/e006551)
Supplement: inline-supplementary-material-3 [file inline-supplementary-material-3.pdf]

| SOC                                           | CTCAE term                         | Grade 1 n (%) | Grade 2 n (%) | Grade 3 n (%) | Grade 4 n (%)           | All grade n (%) |
|-----------------------------------------------|------------------------------------|---------------|---------------|---------------|-------------------------|-----------------|
| <b>General disorders</b>                      | Fatigue                            | 9 (34.62)     | 5 (19.23%)    | 1 (3.85%)     | 0 (0%)                  | 15 (57.69%)     |
| <b>Gastrointestinal disorders</b>             | Diarrhea                           | 7 (26.92%)    | 2 (7.69%)     | 1 (3.85%)     | 0 (0%)                  | 10 (38.46%)     |
| <b>Infections and infestations</b>            | Urinary tract infection            | 0 (0%)        | 6 (23.08%)    | 0 (0%)        | 0 (0%)                  | 6 (23.08%)      |
|                                               | Kidney infection                   | 0 (0%)        | 0 (0%)        | 1 (3.85%)     | 0 (0%)                  | 1 (3.85%)       |
| <b>Laboratory abnormalities</b>               | Serum amylase increased            | 3 (11.54%)    | 1 (3.85%)     | 1 (3.85%)     | 0 (0%)                  | 5 (19.23%)      |
|                                               | Lipase increased                   | 0 (0%)        | 0 (0%)        | 2 (7.69%)     | 1 (3.85%) <sup>##</sup> | 3 (11.54%)      |
|                                               | Creatinine increased               | 3 (11.54%)    | 1 (3.85%)     | 0 (0%)        | 0 (0%)                  | 4 (15.38%)      |
|                                               | Alanine aminotransferase increased | 1 (3.85%)     | 1 (3.85%)     | 0 (0%)        | 1 (3.85%) <sup>##</sup> | 3 (11.54%)      |
|                                               | Platelet count decreased           | 4 (15.38%)    | 0 (0%)        | 0 (0%)        | 0 (0%)                  | 4 (15.38%)      |
|                                               | Anemia                             | 1 (3.85%)     | 0 (0%)        | 1 (3.85%)     | 0 (0%)                  | 2 (7.69%)       |
|                                               | White blood cell decreased         | 2 (7.69%)     | 0 (0%)        | 1 (3.85%)     | 0 (0%)                  | 3 (11.54%)      |
|                                               | Lymphocyte count decreased         | 3 (11.54%)    | 3 (11.54%)    | 6 (23.08%)    | 0 (0%)                  | 12 (46.15%)     |
| <b>Metabolism and nutrition disorders</b>     | Anorexia                           | 2 (7.69%)     | 2 (7.69%)     | 0 (0%)        | 0 (0%)                  | 4 (15.38%)      |
|                                               | Weight gain                        | 0 (0%)        | 0 (0%)        | 1 (3.85%)     | 0 (0%)                  | 1 (3.85%)       |
|                                               | Dehydration                        | 0 (0%)        | 0 (0%)        | 1 (3.85%)     | 0 (0%)                  | 1 (3.85%)       |
| <b>Renal and urinary disorders</b>            | Cystitis noninfective              | 2 (7.69%)     | 7 (26.92%)    | 0 (0%)        | 0 (0%)                  | 9 (34.62%)      |
|                                               | Urinary tract pain                 | 4 (15.38%)    | 0 (0%)        | 0 (0%)        | 0 (0%)                  | 4 (15.38%)      |
|                                               | Acute kidney injury                | 1 (3.85%)     | 1 (3.85%)     | 1 (3.85%)     | 0 (0%)                  | 3 (11.54%)      |
|                                               | Nephritis                          | 0 (0%)        | 0 (0%)        | 1 (3.85%)     | 0 (0%)                  | 1 (3.85%)       |
| <b>Skin and subcutaneous tissue disorders</b> | Rash maculo-papular                | 5 (19.23%)    | 1 (3.85%)     | 0 (0%)        | 0 (0%)                  | 6 (23.08%)      |
|                                               | Rash acneiform                     | 1 (3.85%)     | 0 (0%)        | 1 (3.85%)     | 0 (0%)                  | 2 (7.69%)       |
| <b>Eye disorders</b>                          | Scleral disorder                   | 0 (0%)        | 0 (0%)        | 1 (3.85%)     | 0 (0%)                  | 1 (3.85%)       |
| <b>Respiratory disorders</b>                  | Dyspnea                            | 0 (0%)        | 0 (0%)        | 0 (0%)        | 1 (3.85%) <sup>s</sup>  | 1 (3.85%)       |

**Table 2: Treatment Related Adverse Events (TRAE)**

Above TRAEs are >15% occurrence or any TRAE grade 3 or higher. No grade 5 events were reported

<sup>##</sup>No clinical symptoms

§Patient had underlying COPD and it was thought that his deterioration was related to COPD exacerbation but association to durvalumab could not be ruled out
