# Supplementary material
Source: HighWire-hosted journal article supplement (https://jitc.bmj.com/content/11/2/e006551)
Supplement: inline-supplementary-material-6 [file inline-supplementary-material-6.pdf]

**Supplementary Figure 3a**Progression-free survival vs  
PD-L1 status

+ PD-L1: negative + PD-L1: positive

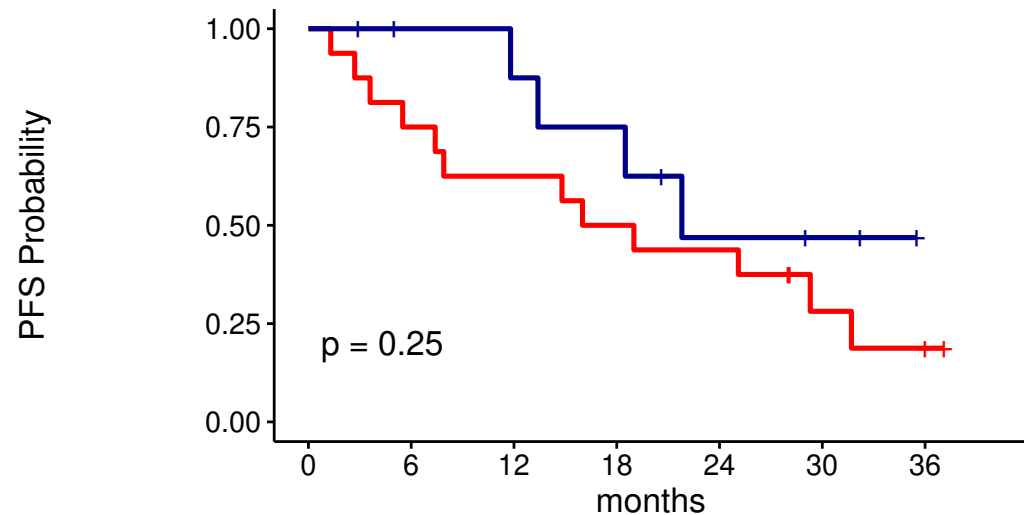

Number at risk

|                |        |    |    |    |    |    |    |
|----------------|--------|----|----|----|----|----|----|
| PD-L1:negative | 16     | 12 | 10 | 8  | 7  | 3  | 2  |
| PD-L1:positive | 10     | 8  | 7  | 6  | 3  | 2  | 0  |
|                | 0      | 6  | 12 | 18 | 24 | 30 | 36 |
|                | months |    |    |    |    |    |    |

**Supplementary Figure 3b**Overall survival vs  
PD-L1 status

+ PD-L1: negative + PD-L1: positive

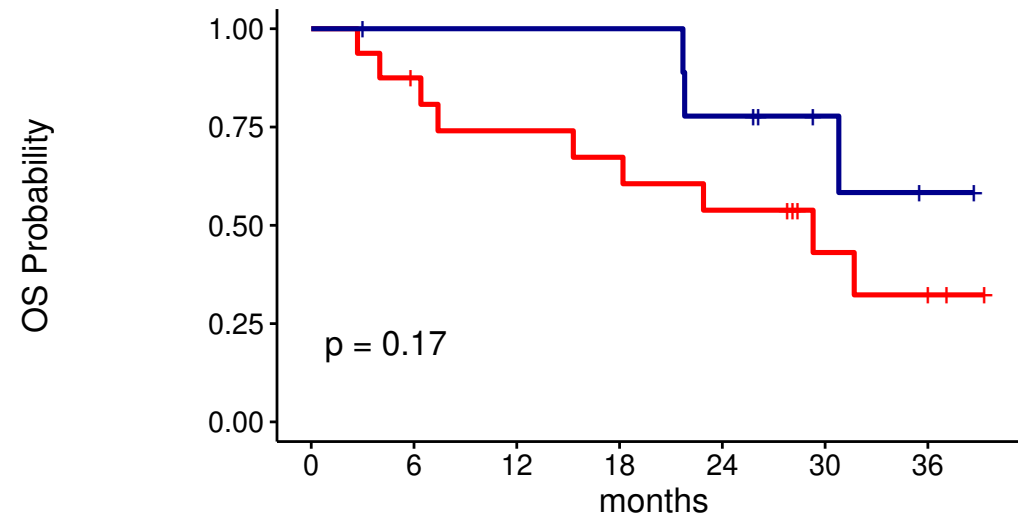

Number at risk

|                |        |    |    |    |    |    |    |
|----------------|--------|----|----|----|----|----|----|
| PD-L1:negative | 16     | 13 | 11 | 10 | 8  | 4  | 3  |
| PD-L1:positive | 10     | 9  | 9  | 9  | 7  | 4  | 1  |
|                | 0      | 6  | 12 | 18 | 24 | 30 | 36 |
|                | months |    |    |    |    |    |    |
